# Supplementary material
Source: Springer Nature journal article supplement (https://www.springermedizin.de/resource/supplementary/12943_2013_1482_MOESM10_ESM.pdf/9553114)

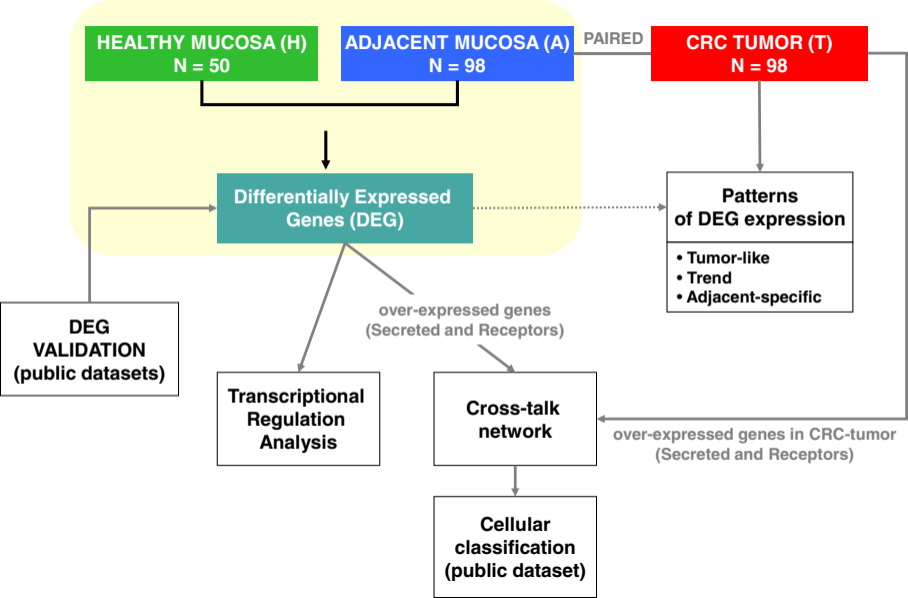

Supplement: MOESM10 [file 9553114]
